# Supplementary material for: Rab27a Targeting to Melanosomes Requires Nucleotide Exchange but Not Effector Binding
Source: PubMed Central journal article supplement (PMC3509405; doi:10.1111/j.1600-0854.2011.01216.x), 2011-06-13
Supplement: tra0012-1056-SD1.pdf [file tra0012-1056-SD1.pdf]

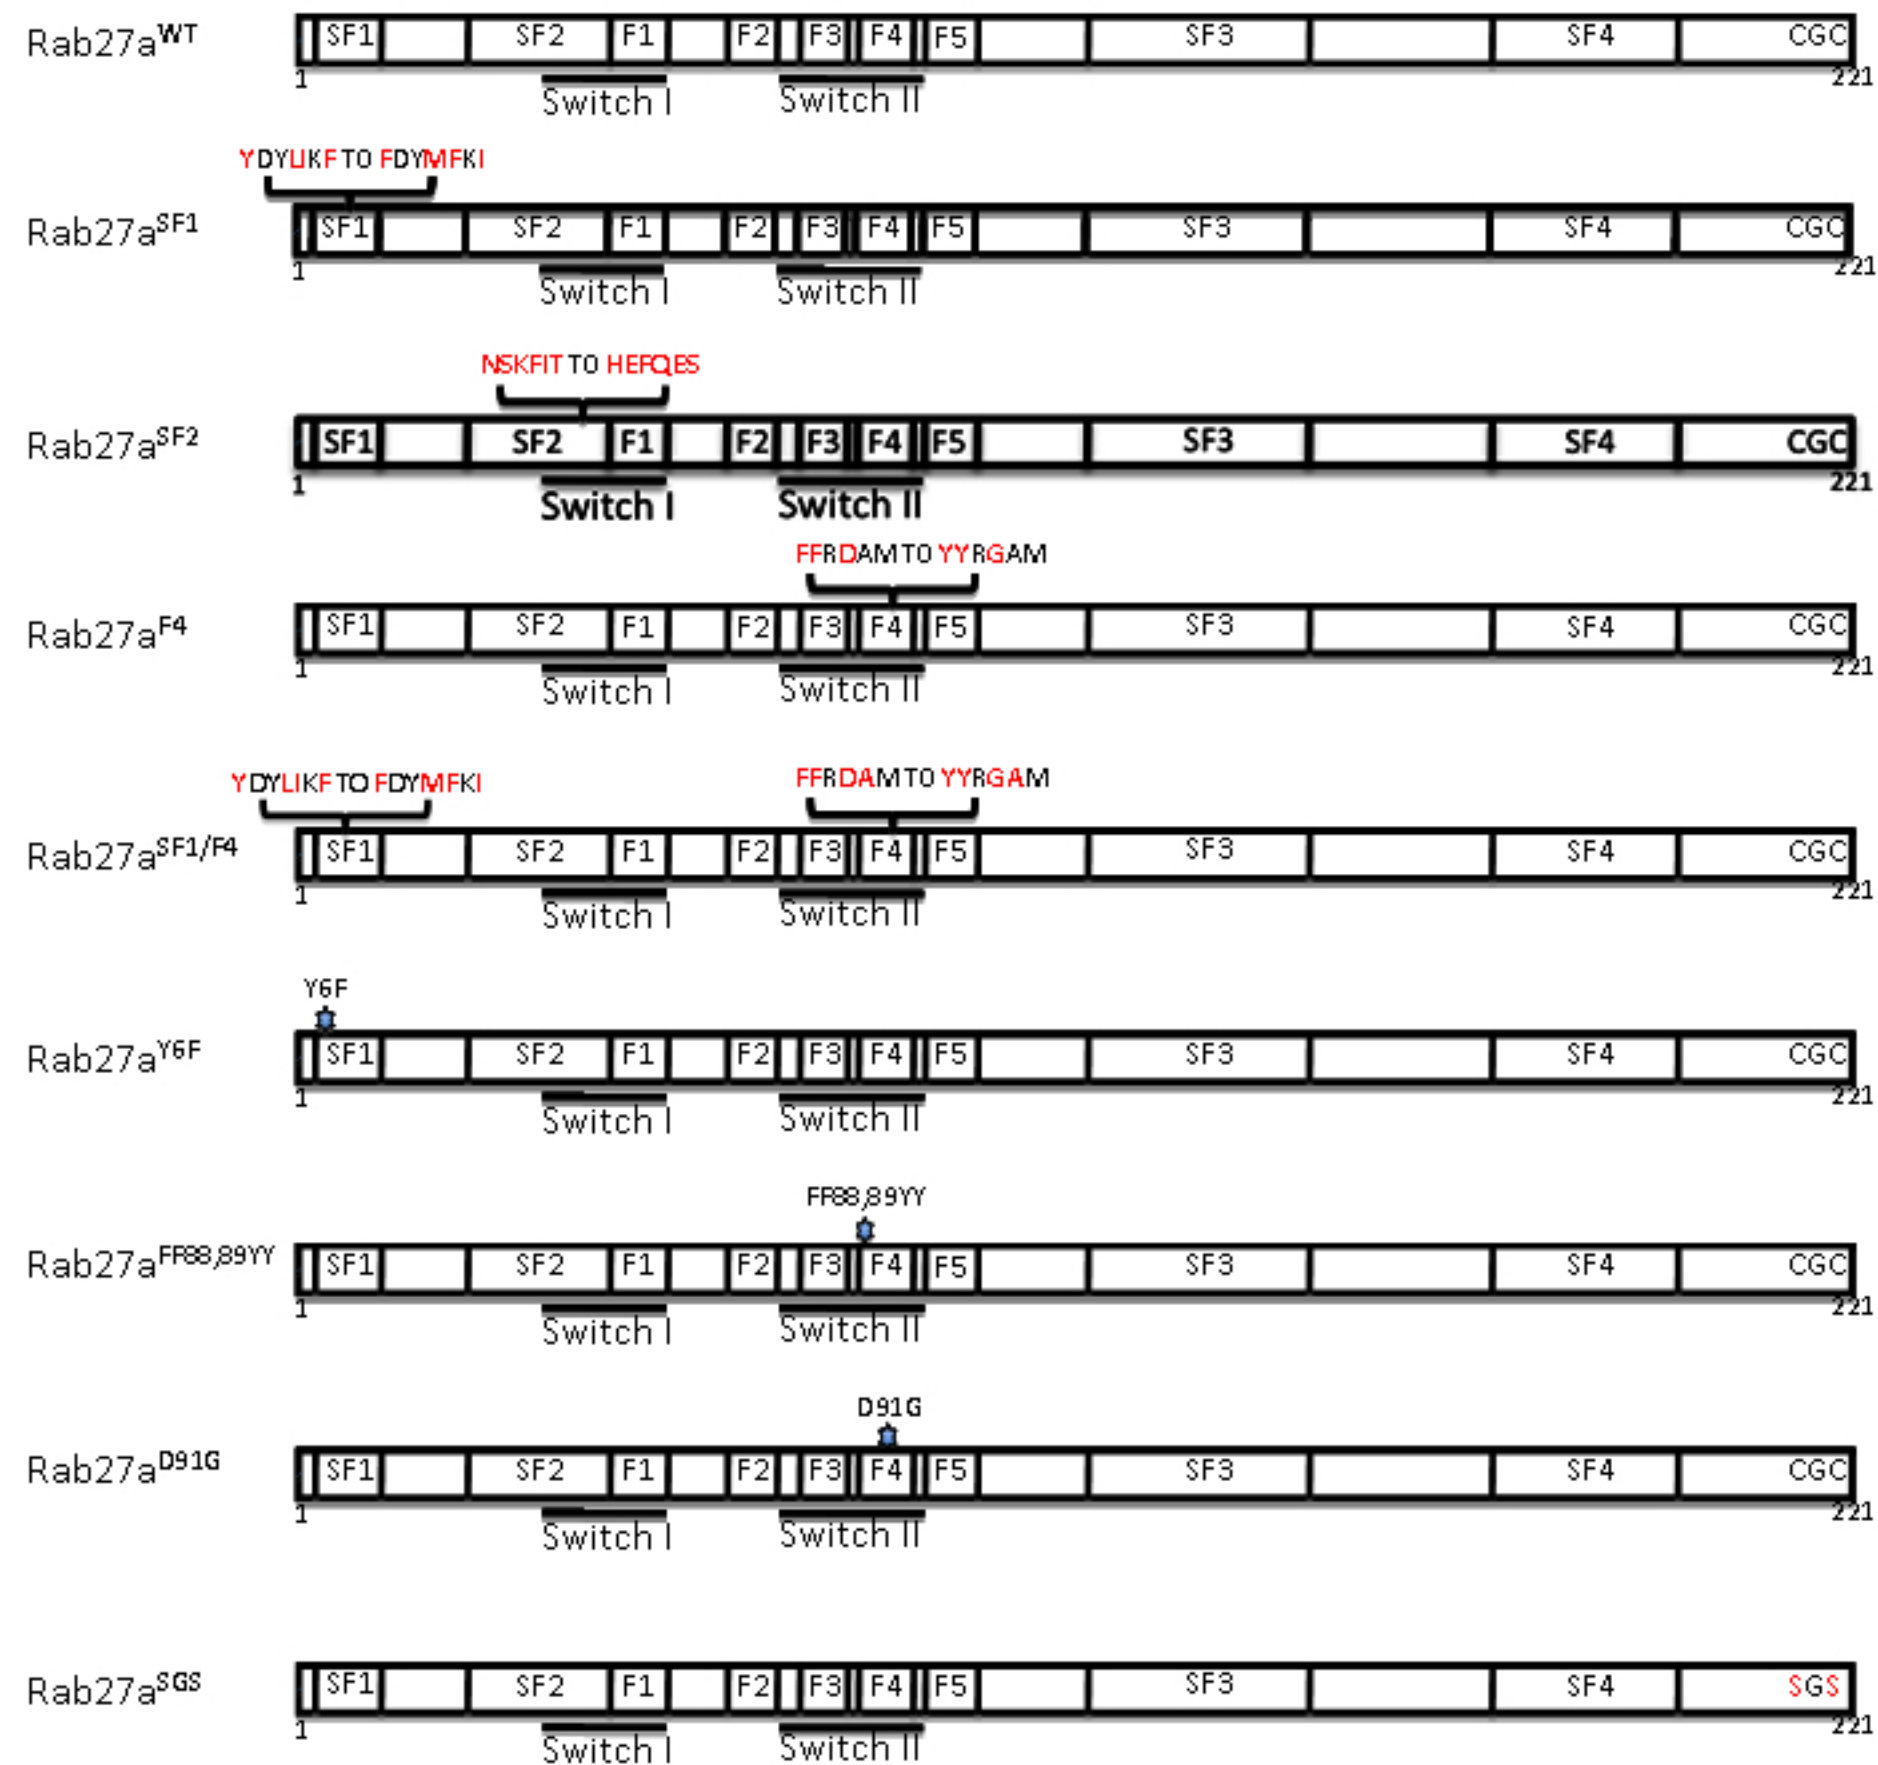

**Supplementary figure 1. Schematic representation of Rab27a mutants.** Schematic representation of Rab27a mutants generated in this study. Residues in red are mutated. F = RabFamily regions and SF= rabsubfamily regions
