# Supplementary material for: Rab27a Targeting to Melanosomes Requires Nucleotide Exchange but Not Effector Binding
Source: PubMed Central journal article supplement (PMC3509405; doi:10.1111/j.1600-0854.2011.01216.x), 2011-06-13
Supplement: tra0012-1056-SD2.pdf [file tra0012-1056-SD2.pdf]

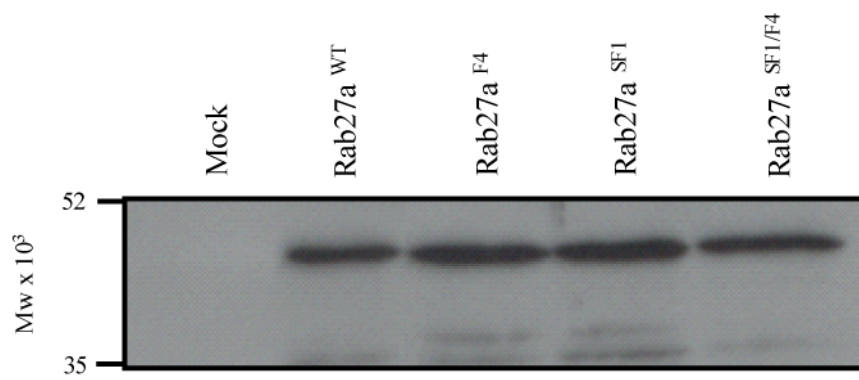

**Supplementary Figure 2. Expression levels of LexA-Rab27a/Rab3a chimeras in L40 Yeast.** L40 Yeast transformed with the appropriate construct were lysed as described in ‘Materials and Methods’ and the lysate separated on a 12.5 % SDS-PAGE gel, transferred to PVDF and immunoblotted using  $\alpha$ -LexA antibody.
